# Supplementary material for: Evaluating the Presence and Contents of Phytochemicals in Honey Samples: Phenolic Compounds as Indicators to Identify Their Botanical Origin
Source: MDPI journal article supplement (doi:10.3390/foods10112616), 2021-10-28
Supplement: s1 [file s1]

# **Evaluating the Presence and Contents of Phytochemicals in Honey Samples: Phenolic Compounds as Indicators to Identify Their Botanical Origin**

**Lua Vazquez <sup>1</sup>, Daniel Armada <sup>1</sup>, Maria Celeiro <sup>1</sup>, Thierry Dagnac <sup>2,\*</sup> and Maria Llompart <sup>1,\*</sup>**

<sup>1</sup> CRETUS, Department of Analytical Chemistry, Nutrition and Food Science, Universidade de Santiago de Compostela, E-15782 Santiago de Compostela, Spain; lua.vazquez.ferreiro@usc.es (L.V.); daniel.armada.alvarez@usc.es (D.A.); maria.celeiro.montero@usc.es (M.C.)

<sup>2</sup> Galician Agency for Food Quality-Agronomic and Agrarian Research Centre (AGACAL-CIAM), Unit of Food and Feed Safety and Organic Contaminants, Apartado 10, E-15080 A Coruña, Spain

\* Correspondence: thierry.dagnac@xunta.gal (T.D.); maria.llompart@usc.es (M.L.)

**Table S1.** Concentration ( $\mu\text{g g}^{-1}$ ) of phenolic compounds, TPC (mg GAE 100g<sup>-1</sup>) and AA ( $\mu\text{mol TRE 100g}^{-1}$ ) in honeys of the 2018 season.

| Compounds                                       | EU1        | BL1        | CN1        | CN2        | CN3        | CN4        | CN5        | HD1        | HD2        | HD3        | HD4         | HD5        | HD6         | HD7         | HD8        | HE1        | HE2        |
|-------------------------------------------------|------------|------------|------------|------------|------------|------------|------------|------------|------------|------------|-------------|------------|-------------|-------------|------------|------------|------------|
| gallic acid                                     |            | 2.1        | 1.1        |            |            | 2.1        |            | 3.0        | 6.2        | 3.0        | 9.8         | 3.8        | 4.5         | 7.0         | 7.0        |            |            |
| phloroglucinic acid                             |            |            |            |            |            |            |            |            |            |            |             |            |             | 1.4         |            |            |            |
| $\beta$ -resorcylic acid/protocatechuic acid    | 0.35       | 3.2        | 2.5        | 0.41       | 0.55       | 2.9        | 0.81       | 4.9        | 7.6        | 3.3        | 6.6         | 5.9        | 7.8         | 6.9         | 9.4        | 0.43       | 0.55       |
| protocatechualdehyde                            |            |            |            | 0.21       | 0.17       |            | 0.19       |            |            |            |             |            |             |             |            | 0.22       | 0.23       |
| gentisic acid                                   | 0.36       | 1.2        | 1.2        | 0.31       | 0.55       | 1.8        | 0.52       | 2.5        | 3.0        | 2.9        | 3.8         | 2.1        | 3.2         | 3.3         | 3.6        | 0.12       | 0.21       |
| chlorogenic acid                                | 0.051      | 0.061      | 0.050      | 0.07       | 0.047      |            | 0.05       | 0.092      |            | 0.10       |             |            | 0.07        |             |            | 0.11       | 0.050      |
| 3-hydroxybenzaldehyde                           |            |            |            |            |            |            |            |            |            |            |             |            |             |             |            | 1.21       |            |
| 4-hydroxybenzaldehyde                           |            |            |            | 1.5        |            |            |            |            |            |            |             |            |             |             |            | 1.7        | 1.8        |
| $\gamma$ -resorcylic acid                       |            | 0.07       | 0.10       |            | 0.12       | 0.11       |            | 0.11       | 0.050      | 0.12       | 0.067       | 0.070      | 0.089       | 0.11        | 0.061      |            |            |
| $\alpha$ -resorcylic acid                       |            | 0.06       | 0.10       |            | 0.092      | 0.089      |            | 0.10       |            | 0.13       | 0.072       | 0.071      | 0.084       |             |            |            |            |
| veratric acid                                   |            | 1.9        |            |            |            |            |            |            |            |            |             | 1.8        |             |             |            |            |            |
| caffeic acid                                    | 0.10       | 0.57       | 0.58       | 0.16       | 0.41       | 0.33       | 0.27       | 0.40       | 0.28       | 0.57       | 0.18        | 0.48       | 0.11        | 0.32        | 0.079      | 0.12       | 0.17       |
| p-coumaric acid                                 | 0.72       | 2.0        | 2.0        | 0.50       | 1.3        | 2.1        | 0.85       | 3.5        | 1.8        | 3.4        | 1.3         | 1.7        | 2.6         | 0.88        | 0.27       | 0.050      | 0.16       |
| veratraldehyde                                  | 0.049      |            |            |            |            |            |            |            |            |            |             | 0.06       |             |             |            | 0.063      |            |
| 4-anisaldehyde                                  |            |            |            | 0.41       |            |            |            |            |            |            |             |            |             |             |            | 0.59       | 0.77       |
| quercetin                                       | 0.47       | 0.44       | 0.44       |            | 0.29       | 0.24       |            | 0.24       | 0.63       | 0.53       | 0.45        | 0.40       | 0.31        | 0.33        | 0.16       |            |            |
| kaempferol                                      |            | 0.47       |            |            |            |            |            | 0.30       | 0.23       | 0.31       | 0.22        | 0.38       |             | 0.25        |            |            | 0.25       |
| apigenin                                        | 0.090      | 0.16       | 0.13       | 0.18       | 0.11       | 0.071      | 0.13       | 0.11       | 0.16       | 0.15       | 0.15        | 0.15       | 0.06        | 0.17        | 0.060      | 0.077      | 0.14       |
| chrysin                                         | 1.6        | 4.9        | 2.9        | 2.4        | 3.3        | 2.4        | 3.0        | 4.2        | 3.2        | 4.4        | 1.8         | 4.2        | 1.5         | 3.8         | 0.99       | 1.9        | 1.8        |
| <i>trans</i> -ferulic acid                      |            | 0.62       |            |            |            | 0.36       |            | 0.64       |            | 0.77       |             | 0.68       | 0.32        | 0.66        | 0.27       | 0.16       | 0.15       |
| p-hydroxybenzoic acid                           | 1.0        | 2.0        | 2.4        | 3.2        | 1.3        | 2.4        | 1.3        | 1.8        | 1.6        | 2.9        | 1.7         | 1.9        | 1.6         | 1.5         | 0.85       | 3.7        | 4.0        |
| 3-hydroxyphenylacetic acid                      |            | 29         |            |            |            | 8.0        |            | 10         |            | 3.7        |             | 0.66       | 11          | 1.9         | 2.0        | 242        | 125        |
| vanillic acid                                   |            | 0.27       |            |            |            | 0.069      |            | 0.14       | 6.2        | 0.23       |             | 0.15       | 0.22        | 0.63        | 0.55       | 0.10       | 0.12       |
| <b><math>\Sigma</math> [Phenolic compounds]</b> | <b>4.9</b> | <b>49</b>  | <b>14</b>  | <b>9.4</b> | <b>8.2</b> | <b>23</b>  | <b>7.1</b> | <b>32</b>  | <b>25</b>  | <b>27</b>  | <b>26</b>   | <b>24</b>  | <b>33.0</b> | <b>29.3</b> | <b>35</b>  | <b>252</b> | <b>135</b> |
| <b>TPC (mg GAE/100 g)</b>                       | <b>68</b>  | <b>111</b> | <b>129</b> | <b>165</b> | <b>86</b>  | <b>122</b> | <b>97</b>  | <b>152</b> | <b>177</b> | <b>142</b> | <b>174</b>  | <b>131</b> | <b>144</b>  | <b>150</b>  | <b>179</b> | <b>203</b> | <b>191</b> |
| <b>AA (<math>\mu\text{mol TRE/100g}</math>)</b> | <b>102</b> | <b>286</b> | <b>339</b> | <b>200</b> | <b>185</b> | <b>404</b> | <b>140</b> | <b>568</b> | <b>878</b> | <b>501</b> | <b>1006</b> | <b>548</b> | <b>615</b>  | <b>830</b>  | <b>907</b> | <b>224</b> | <b>234</b> |

\*EU: Eucalyptus; BL: Blackberry; CN: Chestnut; HD: Honeydew; HE: Heather.

**Table S1. Continuation.** Concentration ( $\mu\text{g g}^{-1}$ ) of phenolic compounds, TPC (mg GAE 100g<sup>-1</sup>) and AA ( $\mu\text{mol TRE 100g}^{-1}$ ) in honeys of the 2018 season.

| Compounds <sup>1</sup>                          | MF1        | MF2        | MF3        | MF4        | MF5        | MF6        | MF7        | MF8        | MF9        | MF10       | MF11       | MF12       | MF13       | MF14       | MF15       | MF16       | MF17       | MF18       |
|-------------------------------------------------|------------|------------|------------|------------|------------|------------|------------|------------|------------|------------|------------|------------|------------|------------|------------|------------|------------|------------|
| gallic acid                                     | 0.84       |            | 1.8        | 0.33       | 0.26       |            | 0.21       |            |            | 0.52       | 0.24       | 3.5        | 0.21       | 0.57       | 0.76       |            | 0.22       |            |
| phloroglucinic acid                             |            |            |            |            |            |            |            |            |            |            |            |            |            |            |            |            |            |            |
| $\beta$ -resorcylic acid/protocatechuic acid    | 2.6        | 2.1        | 4.2        | 0.45       | 0.54       | 0.52       | 1.9        | 1.0        | 0.74       | 0.70       | 0.59       | 11         | 1.1        | 0.69       | 0.66       | 0.55       | 0.99       | 0.94       |
| protocatechualdehyde                            | 0.20       | 0.12       |            | 0.36       | 0.43       | 0.080      | 0.20       | 0.12       | 0.23       | 0.07       | 0.11       |            | 0.28       | 0.21       | 0.078      | 0.05       | 0.18       | 0.090      |
| gentisic acid                                   | 1.2        | 2.0        | 0.92       |            |            | 0.27       | 5.2        | 2.0        | 0.15       | 1.3        | 0.16       | 1.7        | 2.9        | 0.54       | 0.22       | 0.15       | 2.6        | 2.2        |
| chlorogenic acid                                | 0.088      | 0.070      |            | 0.16       | 0.17       | 0.10       | 0.11       | 0.15       |            | 0.070      |            | 0.19       | 0.13       | 0.10       | 0.051      | 0.050      | 0.089      | 0.18       |
| 3-hydroxybenzaldehyde                           |            |            |            |            | 0.97       |            | 0.12       | 0.17       | 0.48       |            |            |            |            |            |            |            |            |            |
| 4-hydroxybenzaldehyde                           |            |            |            | 0.20       | 1.4        |            |            |            | 2.0        |            |            |            |            |            |            |            | 0.10       | 0.13       |
| $\gamma$ -resorcylic acid                       | 0.057      | 0.10       |            |            |            |            | 0.31       | 0.10       |            | 0.060      |            |            | 0.13       |            |            |            | 0.10       | 0.10       |
| $\alpha$ -resorcylic acid                       | 0.064      | 0.083      | 0.072      |            |            |            | 0.28       | 0.080      |            | 0.070      |            |            | 0.11       |            |            |            | 0.11       | 0.091      |
| veratric acid                                   |            |            |            |            |            |            |            |            |            |            |            |            |            |            |            |            |            |            |
| caffeic acid                                    | 0.38       | 0.19       | 0.47       | 0.43       | 0.64       | 0.11       | 0.31       | 0.049      | 0.051      | 0.10       | 0.39       | 0.24       | 0.34       | 0.35       | 0.18       | 0.19       | 0.22       | 0.15       |
| p-coumaric acid                                 | 1.2        | 10         | 1.4        | 1.6        | 1.5        | 1.5        | 11         | 11         | 0.38       | 5.1        | 1.3        | 1.5        | 12         | 2.2        | 0.71       | 3.3        | 4.3        | 4.0        |
| veratraldehyde                                  | 0.051      |            | 0.059      | 0.06       |            |            |            |            |            | 0.07       |            |            | 0.26       | 0.05       | 0.26       | 0.45       | 0.20       | 0.06       |
| 4-anisaldehyde                                  | 0.22       |            |            | 0.58       |            | 0.21       |            |            | 0.66       |            |            |            | 0.18       | 0.16       |            |            |            | 0.31       |
| quercetin                                       | 0.42       | 0.39       | 0.38       | 0.53       |            |            | 0.65       | 0.35       |            | 0.44       | 0.60       | 0.47       | 0.67       | 0.76       | 0.59       | 0.33       | 0.34       | 0.29       |
| kaempferol                                      | 0.36       |            | 0.33       |            | 0.71       |            | 0.33       |            |            |            | 0.36       |            | 0.31       |            |            | 0.30       | 0.22       |            |
| apigenin                                        | 0.11       | 0.056      | 0.14       | 0.17       | 0.43       | 0.081      | 0.10       |            |            |            | 0.23       | 0.17       | 0.12       | 0.13       | 0.17       | 0.09       | 0.14       | 0.09       |
| chrysin                                         | 3.7        | 2.0        | 4.4        | 4.2        | 5.9        | 1.8        | 3.1        | 0.69       | 0.51       | 1.5        | 4.3        | 2.0        | 4.4        | 3.1        | 3.0        | 2.8        | 2.0        | 2.0        |
| <i>trans</i> -ferulic acid                      |            | 0.19       | 0.83       |            |            |            |            |            |            |            |            | 0.19       | 0.46       |            |            | 0.19       |            |            |
| p-hydroxybenzoic acid                           | 3.5        | 2.1        | 2.8        | 3.3        | 3.8        | 1.9        | 3.2        | 3.0        | 4.6        | 1.9        | 1.0        | 2.6        | 3.6        | 2.1        | 1.3        | 4.1        | 5.1        | 4.2        |
| 3-hydroxyphenylacetic acid                      |            | 21         | 8.3        |            |            |            |            |            |            |            |            | 8.3        | 6.9        |            |            | 20         |            |            |
| vanillic acid                                   |            | 0.11       | 0.069      |            |            |            |            |            |            |            |            | 0.40       | 0.52       |            |            |            |            |            |
| <b><math>\Sigma</math> [Phenolic compounds]</b> | <b>15</b>  | <b>40</b>  | <b>26</b>  | <b>12</b>  | <b>17</b>  | <b>6.5</b> | <b>27</b>  | <b>19</b>  | <b>9.8</b> | <b>12</b>  | <b>9.3</b> | <b>33</b>  | <b>35</b>  | <b>11</b>  | <b>8.0</b> | <b>33</b>  | <b>17</b>  | <b>15</b>  |
| <b>TPC (mg GAE/100 g)</b>                       | <b>156</b> | <b>133</b> | <b>102</b> | <b>142</b> | <b>136</b> | <b>109</b> | <b>123</b> | <b>145</b> | <b>176</b> | <b>116</b> | <b>79</b>  | <b>136</b> | <b>142</b> | <b>115</b> | <b>83</b>  | <b>97</b>  | <b>145</b> | <b>148</b> |
| <b>AA (<math>\mu\text{mol TRE/100g}</math>)</b> | <b>324</b> | <b>283</b> | <b>311</b> | <b>139</b> | <b>175</b> | <b>127</b> | <b>282</b> | <b>249</b> | <b>241</b> | <b>180</b> | <b>121</b> | <b>484</b> | <b>249</b> | <b>104</b> | <b>127</b> | <b>105</b> | <b>185</b> | <b>183</b> |

\*MF: Multi-floral.

**Table S2.** Concentration ( $\mu\text{g g}^{-1}$ ) of phenolic compounds, TPC (mg GAE 100g<sup>-1</sup>) and AA ( $\mu\text{mol TRE 100g}^{-1}$ ) in honeys of the 2019 season.

| Compounds                             | EU2   | EU3   | EU4   | EU5   | EU6   | EU7   | EU8   | EU9   | EU10  | EU11  | EU12 | BL2   | BL3   | BL4   | BL5   | BL6   | BL7   | BL8   |
|---------------------------------------|-------|-------|-------|-------|-------|-------|-------|-------|-------|-------|------|-------|-------|-------|-------|-------|-------|-------|
| gallic acid                           |       |       | 0.19  | 0.27  | 0.22  | 0.34  |       |       | 0.47  | 0.20  | 0.13 | 0.33  | 0.46  | 1.6   | 0.29  | 0.37  | 2.0   | 0.66  |
| phloroglucinic acid                   |       |       |       |       |       |       |       |       |       |       |      |       | 0.21  | 0.34  |       |       |       |       |
| β-resorcylic acid/protocatechuic acid |       |       |       |       |       |       |       |       |       |       | 0.22 | 0.50  | 0.88  | 2.9   | 0.96  | 0.42  | 4.6   | 2.0   |
| caftaric acid                         | 0.32  | 0.54  | 0.49  | 0.48  | 0.55  | 0.32  | 0.46  | 0.49  | 0.36  | 0.26  |      |       | 0.05  |       |       |       |       |       |
| protocatechualdehyde                  | 0.061 | 0.10  |       |       |       |       |       |       |       |       |      |       |       |       |       |       |       |       |
| gentisic acid                         | 0.075 | 0.14  | 0.27  | 0.18  | 0.080 | 0.091 | 0.090 | 0.048 |       |       |      | 0.15  | 0.15  |       | 0.19  | 0.13  |       | 0.069 |
| gentisaldehyde                        | 0.11  | 0.081 | 0.12  | 0.10  | 0.44  | 0.23  | 0.10  | 0.16  |       | 0.071 | 0.10 | 0.17  | 0.43  | 1.1   | 0.30  | 0.10  | 1.3   | 0.97  |
| chlorogenic acid                      | 0.31  | 0.49  | 0.54  |       |       |       |       |       |       |       |      |       |       |       |       |       |       |       |
| 3-hydroxybenzaldehyde                 |       | 0.10  | 0.078 |       |       | 0.10  | 0.10  |       |       |       |      |       | 0.05  | 0.071 | 0.062 | 0.090 |       | 0.070 |
| 4-hydroxybenzaldehyde                 |       | 0.85  | 0.51  | 0.87  |       | 0.13  |       |       |       |       |      |       | 0.22  |       | 0.10  |       |       |       |
| γ-resorcylic acid                     |       | 1.3   | 1.3   | 1.2   |       |       | 1.3   |       |       |       |      |       | 0.28  |       |       |       |       |       |
| α-resorcylic acid                     | 0.051 |       |       |       | 0.060 |       |       | 0.073 |       |       |      | 0.050 |       | 0.089 |       | 0.05  | 0.081 | 0.069 |
| veratric acid                         |       |       |       |       | 0.062 |       |       | 0.067 |       |       |      |       | 0.051 | 0.080 |       | 0.05  | 0.070 | 0.062 |
| caffeic acid                          |       |       |       |       |       |       |       |       |       |       |      |       |       |       |       | 1.2   |       |       |
| p-coumaric acid                       | 0.17  | 0.11  | 0.37  | 0.37  | 0.32  | 0.25  | 0.12  | 0.23  | 0.068 | 0.080 | 0.17 | 0.81  | 0.47  | 0.57  | 0.58  | 0.44  | 0.35  | 0.59  |
| veratraldehyde                        | 0.78  | 0.48  | 1.4   | 1.2   | 2.4   | 4.2   | 0.92  | 0.76  | 0.52  | 0.59  | 1.6  | 0.44  | 2.6   | 2.1   | 3.8   | 1.7   | 0.98  | 4.1   |
| 4-anisaldehyde                        | 0.083 | 0.080 | 0.067 | 0.060 | 0.12  | 0.05  |       |       |       |       |      |       | 0.09  |       |       |       |       |       |
| quercetin                             |       |       | 0.28  |       |       |       |       |       |       |       |      |       |       |       |       |       |       |       |
| kaempferol                            | 0.51  |       |       | 0.25  | 0.66  | 0.80  |       |       | 0.28  |       | 0.59 |       | 1.2   | 0.48  | 1.0   | 1.1   | 0.25  | 1.4   |
| apigenin                              | 0.25  |       |       | 0.44  | 0.23  |       |       |       |       |       |      |       | 0.46  | 0.25  | 0.49  | 0.32  |       | 0.43  |
| chrysin                               | 0.10  | 0.075 | 0.16  | 0.39  | 0.11  | 0.25  | 0.14  | 0.13  |       |       | 0.06 | 0.17  | 0.26  | 0.23  | 0.23  | 0.31  | 0.13  | 0.26  |
| trans-ferulic acid                    | 1.9   | 0.89  | 2.9   | 3.4   | 2.1   | 2.9   | 1.2   | 2.0   | 0.50  | 0.87  | 1.9  | 2.2   | 5.5   | 3.2   | 3.5   | 2.7   | 2.5   | 5.9   |
| p-hydroxybenzoic acid                 | 0.71  | 0.54  | 0.88  | 0.88  | 0.91  | 0.87  | 0.53  | 0.69  | 0.51  | 0.48  | 0.61 | 0.67  | 1.5   | 1.0   | 1.7   | 1.3   | 0.90  | 1.3   |
| 3-hydroxyphenylacetic acid            | 0.77  | 1.7   | 1.7   | 2.3   | 1.3   | 1.5   | 2.3   | 0.92  | 1.2   | 0.85  | 0.97 | 1.5   | 2.3   | 1.2   | 0.88  | 0.78  | 0.68  | 1.8   |
| vanillic acid                         |       | 61    | 53    | 80    |       |       | 123   |       | 12    |       |      | 64    |       |       |       |       |       | 3.7   |
| Σ [Phenolic compounds]                | 6.2   | 68    | 64    | 93    | 9.6   | 12    | 130   | 5.5   | 16    | 3.4   | 6.4  | 71    | 17    | 15    | 14    | 11    | 13.9  | 2     |
| TPC (mg GAE /100 g)                   | 61    | 139   | 127   | 115   | 64    | 105   | 124   | 61    | 58    | 48    | 52   | 48    | 97    | 95    | 57    | 61    | 111   | 98    |
| AA (μmol TRE/100g)                    | 151   | 249   | 846   | 143   | 104   | 201   | 363   | 353   | 312   | 15    | 28   | 201   | 220   | 164   | 111   | 186   | 428   | 260   |

\*EU: Eucalyptus; BL: Blackberry.

**Table S2. Continuation.** Concentration ( $\mu\text{g g}^{-1}$ ) of phenolic compounds, TPC (mg GAE 100g $^{-1}$ ) and AA ( $\mu\text{mol TRE 100g}^{-1}$ ) in honeys of the 2019 season.

| Compounds                                         | CN6   | CN7   | CN8   | CN9   | CN10  | CN11  | CN12  | CN/<br>HD1 | CN/<br>HD2 | CN/<br>HD3 | CN/<br>HD4 | CN/<br>HD5 | CN/<br>HD6 | CN/<br>HD7 | HD9   | HD10  | HD11  | HD12 | HE3  | HE4  |
|---------------------------------------------------|-------|-------|-------|-------|-------|-------|-------|------------|------------|------------|------------|------------|------------|------------|-------|-------|-------|------|------|------|
| gallic acid                                       | 0.46  | 0.48  | 0.18  | 0.29  | 0.32  | 3.3   | 0.18  | 1.6        | 6.8        | 1.7        | 5.4        | 3.8        | 5.7        | 5.2        | 1.6   | 7.2   | 6.7   | 6.6  | 1.1  | 0.20 |
| phloroglucinic acid                               | 0.13  |       | 0.11  |       |       |       |       | 0.29       | 0.42       | 0.29       | 0.87       |            |            |            | 0.31  |       |       |      | 0.38 |      |
| $\beta$ -resorcylic ac-<br>id/protocatechuic acid | 1.4   | 1.3   | 0.37  | 0.40  | 0.64  | 5.9   | 0.67  | 2.5        | 8.0        | 2.7        | 7.2        | 4.8        | 7.2        | 6.1        | 6.2   | 10    | 9.6   | 5.7  | 2.5  | 0.36 |
| caftaric acid                                     |       |       |       |       |       |       |       |            |            |            |            |            |            |            |       |       |       |      |      |      |
| protocatechualdehyde                              | 0.090 | 0.10  | 0.22  | 0.25  | 0.24  |       | 0.093 | 0.054      |            |            |            |            |            |            |       |       |       |      |      | 0.16 |
| gentisic acid                                     | 1.2   | 1.1   | 0.16  | 0.31  | 0.37  | 2.0   | 1.3   | 1.8        | 2.6        | 1.7        | 3.0        | 2.6        | 2.9        | 2.5        | 1.6   | 2.3   | 2.2   | 2.0  | 0.98 | 0.14 |
| gentisaldehyde                                    | 0.21  |       | 0.43  | 0.24  | 0.18  |       |       |            |            |            |            | 0.64       |            |            |       |       |       |      | 0.32 |      |
| chlorogenic acid                                  | 0.071 | 0.056 | 0.10  | 0.069 | 0.054 |       | 0.18  | 0.15       |            | 0.064      |            |            |            |            |       |       |       | 0.06 |      | 0.12 |
| 3-hydroxybenzaldehyde                             |       |       |       |       |       |       | 0.30  |            |            |            |            |            |            |            |       | 0.10  |       |      |      | 0.73 |
| 4-hydroxybenzaldehyde                             |       | 0.33  | 0.67  |       |       |       | 0.35  |            |            |            |            |            |            |            |       |       |       |      |      | 1.2  |
| $\gamma$ -resorcylic acid                         | 0.082 | 0.10  | 0.050 | 0.10  | 0.11  | 0.073 | 0.066 | 0.10       |            | 0.10       | 0.10       | 0.10       | 0.083      | 0.058      | 0.12  | 0.070 |       | 0.05 | 0.08 |      |
| $\alpha$ -resorcylic acid                         | 0.078 | 0.11  |       | 0.10  | 0.10  | 0.077 | 0.092 | 0.10       |            | 0.10       | 0.10       | 0.081      | 0.055      | 0.053      | 0.11  | 0.064 |       |      | 0.07 |      |
| veratricacid                                      |       |       |       |       | 1.6   |       |       |            |            |            |            |            |            |            |       |       |       |      |      |      |
| caffeic acid                                      | 0.44  | 0.27  | 0.21  | 0.69  | 0.85  | 0.26  | 0.06  | 0.33       | 0.28       | 0.57       | 0.24       | 0.62       | 0.35       | 0.22       | 0.43  | 0.13  | 0.073 | 0.31 | 0.42 | 0.17 |
| p-coumaric acid                                   | 5.1   | 4.5   | 5.4   | 3.2   | 1.4   | 1.8   | 11    | 6.7        | 1.4        | 5.5        | 1.6        | 4.5        | 1.6        | 1.7        | 1.4   | 1.6   | 0.59  | 1.4  | 2.6  | 0.65 |
| veratraldehyde                                    |       |       |       |       |       |       |       |            |            |            |            |            |            |            | 0.070 |       |       |      |      | 0.10 |
| 4-anisaldehyde                                    |       | 0.13  |       |       |       |       | 0.24  |            |            |            |            |            |            |            |       |       |       |      |      | 0.14 |
| quercetin                                         | 0.59  | 0.45  | 1.3   | 0.28  | 0.33  | 0.43  | 0.22  | 0.42       | 0.39       | 0.62       |            | 0.46       | 0.39       |            | 0.31  |       | 0.22  | 0.29 | 0.79 |      |
| kaempferol                                        |       |       | 0.60  |       | 0.44  | 0.27  |       | 0.32       |            | 0.41       |            | 0.37       |            | 0.24       |       |       |       | 0.26 | 0.31 |      |
| apigenin                                          | 0.17  | 0.083 | 0.31  | 0.23  | 0.20  | 0.090 | 0.10  | 0.16       | 0.10       | 0.21       | 0.10       | 0.20       | 0.10       | 0.091      | 0.17  | 0.059 |       | 0.20 | 0.19 | 0.11 |
| chrysin                                           | 3.5   | 1.7   | 4.5   | 3.4   | 3.6   | 2.1   | 0.53  | 3.3        | 2.1        | 4.2        | 2.1        | 2.9        | 1.7        | 2.2        | 2.5   | 1.2   | 0.94  | 2.4  | 3.1  | 2.4  |
| trans-ferulic acid                                | 0.96  | 0.83  | 2.0   | 1.1   | 1.2   | 0.58  | 0.44  | 0.73       | 0.78       | 0.92       | 0.74       | 1.0        | 0.42       | 0.43       | 0.96  | 0.62  | 0.31  | 0.86 | 1.1  | 0.51 |
| p-hydroxybenzoic acid                             | 1.4   | 3.4   | 1.2   | 1.3   | 1.7   | 2.5   | 1.8   | 2.4        | 1.4        | 2.5        | 1.7        | 2.2        | 1.1        | 1.7        | 2.1   | 1.6   | 0.83  | 0.98 | 1.4  | 1.6  |
| 3-hydroxyphenylacetic acid                        |       |       |       | 2.8   |       |       | 12    |            |            |            |            |            | 1.7        | 9.5        |       |       | 0.41  |      |      | 54   |
| vanillic acid                                     |       |       |       |       |       | 0.20  |       |            |            |            |            |            | 0.15       | 0.40       |       |       | 0.37  |      |      |      |
| $\Sigma$ [Phenolic compounds]                     | 16    | 15    | 18    | 14.7  | 13    | 31    | 18    | 21         | 26         | 22         | 23         | 26         | 23         | 30         | 18    | 25    | 22    | 21   | 15   | 62   |
| TPC (mg GAE/100 g)                                | 134   | 112   | 117   | 69.4  | 64    | 129   | 192   | 135        | 160        | 119        | 147        | 125        | 192        | 159        | 95    | 172   | 110   | 197  | 102  | 156  |
| AA ( $\mu\text{mol TRE/100g}$ )                   | 315   | 277   | 220   | 194   | 199   | 540   | 163   | 485        | 697        | 228        | 611        | 427        | 845        | 854        | 420   | 874   | 1017  | 903  | 392  | 138  |

CN: Chestnut; CN/HD: Chestnut/Honeydew; HD: Honeydew; HE: Heather.

**Table S2. Continuation.** Concentration ( $\mu\text{g g}^{-1}$ ) of phenolic compounds, TPC (mg GAE 100g<sup>-1</sup>) and AA ( $\mu\text{mol TRE 100g}^{-1}$ ) in honeys of the 2019 season.

| Compounds                                       | MF19       | MF20       | MF21       | MF22       | MF23       | MF24       | MF25       | MF26       | MF27       | MF28       | MF29       | MF30       | MF31       | MF32       | MF33       | MF34       | MF35       | MF36       |
|-------------------------------------------------|------------|------------|------------|------------|------------|------------|------------|------------|------------|------------|------------|------------|------------|------------|------------|------------|------------|------------|
| gallic acid                                     |            | 0.20       | 0.46       | 0.24       | 1.1        | 0.19       | 0.35       | 0.27       | 0.54       | 0.15       | 0.22       | 0.15       | 0.53       | 4.5        | 0.16       | 1.7        | 0.24       |            |
| phloroglucinic acid                             | 0.18       | 0.32       | 0.32       |            |            |            |            |            |            |            |            |            |            |            |            |            |            |            |
| $\beta$ -resorcylic acid/protocatechuic acid    | 0.94       | 0.79       | 1.9        | 0.35       | 2.9        | 0.54       | 0.82       | 0.50       | 0.39       | 0.52       | 0.26       | 0.38       | 0.78       | 6.4        | 0.52       | 4.7        | 0.33       | 0.42       |
| caftaric acid                                   |            |            | 0.078      |            |            |            |            |            |            |            |            |            |            |            |            |            |            |            |
| protocatechualdehyde                            | 0.13       | 0.19       | 0.11       | 0.052      |            | 0.12       | 0.13       | 0.18       | 0.11       |            | 0.16       | 0.14       | 0.070      |            |            |            | 0.080      | 0.11       |
| gentisic acid                                   | 0.59       | 0.97       | 3.5        |            | 0.81       | 0.22       | 1.9        | 0.42       | 0.61       |            | 0.16       | 0.063      | 0.98       | 2.7        | 0.11       | 2.1        | 0.41       | 0.20       |
| gentisaldehyde                                  |            | 0.22       |            |            |            |            |            |            |            | 0.27       |            |            |            |            |            |            |            |            |
| chlorogenic acid                                | 0.07       | 0.054      | 0.070      | 0.071      |            | 0.066      | 0.08       | 0.067      | 0.10       |            |            |            |            | 0.062      |            |            | 0.048      |            |
| 3-hydroxybenzaldehyde                           |            |            |            |            |            |            |            |            |            |            |            |            |            |            |            |            |            |            |
| 4-hydroxybenzaldehyde                           | 0.32       |            |            |            |            | 1.5        | 0.23       |            |            | 1.5        |            |            |            |            |            |            |            |            |
| $\gamma$ -resorcylic acid                       | 0.051      | 0.057      | 0.18       |            | 0.10       |            | 0.13       | 0.052      |            |            | 0.063      |            | 0.12       | 0.078      |            | 0.068      |            |            |
| $\alpha$ -resorcylic acid                       | 0.060      | 0.072      | 0.20       |            | 0.090      |            | 0.11       | 0.063      | 0.078      |            | 0.088      |            | 0.13       | 0.061      | 0.06       | 0.067      | 0.051      | 0.063      |
| veratric acid                                   |            |            |            |            |            |            |            | 0.89       |            |            |            |            |            |            |            |            |            | 1.3        |
| caffeic acid                                    | 0.43       | 0.23       | 0.40       | 0.16       | 0.55       | 0.079      | 0.15       | 0.44       | 0.28       | 0.053      | 0.35       | 0.26       | 0.25       | 0.43       | 0.18       | 0.27       | 0.20       | 0.31       |
| p-coumaric acid                                 | 3.4        | 8.2        | 4.7        | 1.5        | 2.3        | 0.63       | 10         | 3.5        | 2.0        | 0.14       | 1.2        | 0.95       | 1.7        | 10         | 6.2        | 7.6        | 4.4        | 1.3        |
| veratraldehyde                                  | 0.055      |            |            |            |            |            |            |            |            |            |            |            |            |            |            | 0.050      |            |            |
| 4-anisaldehyde                                  | 0.12       |            |            |            |            |            |            |            | 0.13       | 0.72       |            |            |            |            |            |            |            |            |
| quercetin                                       | 0.48       | 0.58       | 0.81       |            | 0.83       |            | 0.91       | 1.1        | 0.47       |            | 0.45       | 0.32       |            | 0.61       | 1.0        |            | 0.63       | 0.38       |
| kaempferol                                      | 0.24       |            | 0.26       |            | 0.32       |            |            | 0.34       |            |            |            | 0.23       |            | 0.39       | 0.46       |            |            |            |
| apigenin                                        | 0.12       | 0.092      | 0.14       | 0.13       | 0.23       | 0.073      |            | 0.32       | 0.18       | 0.045      | 0.09       | 0.17       | 0.08       | 0.17       | 0.26       | 0.10       | 0.10       | 0.15       |
| chrysin                                         | 3.2        | 1.5        | 3.4        | 1.6        | 3.7        | 0.72       | 1.7        | 4.1        | 2.2        | 0.70       | 2.4        | 2.4        | 2.8        | 4.2        | 2.0        | 1.8        | 2.3        | 2.8        |
| trans-ferulic acid                              | 1.5        | 0.64       | 0.32       | 0.69       | 1.2        | 0.47       | 0.60       | 0.97       | 0.65       | 0.36       | 0.77       | 0.75       | 0.68       | 0.58       | 0.57       | 0.34       | 0.81       | 0.92       |
| p-hydroxybenzoic acid                           | 2.5        | 1.5        | 2.0        | 1.4        | 1.8        | 2.5        | 2.0        | 1.8        | 1.4        | 2.3        | 0.86       | 0.77       | 0.96       | 2.3        | 1.5        | 1.5        | 1.5        | 0.71       |
| 3-hydroxyphenylacetic acid                      |            |            | 1.3        | 17         |            |            |            |            |            | 138        |            |            |            | 5.0        |            | 12         |            |            |
| vanillic acid                                   |            |            |            |            |            |            |            |            |            |            |            |            |            | 0.58       |            | 0.15       |            |            |
| <b><math>\Sigma</math> [Phenolic compounds]</b> | <b>14</b>  | <b>16</b>  | <b>20</b>  | <b>23</b>  | <b>16</b>  | <b>7.2</b> | <b>19</b>  | <b>15</b>  | <b>9.2</b> | <b>144</b> | <b>7.1</b> | <b>6.6</b> | <b>9.1</b> | <b>38</b>  | <b>13</b>  | <b>32</b>  | <b>11</b>  | <b>8.6</b> |
| <b>TPC (mg GAE/100 g)</b>                       | <b>117</b> | <b>83</b>  | <b>98</b>  | <b>78</b>  | <b>91</b>  | <b>170</b> | <b>193</b> | <b>90</b>  | <b>111</b> | <b>144</b> | <b>61</b>  | <b>55</b>  | <b>113</b> | <b>13</b>  | <b>56</b>  | <b>133</b> | <b>87</b>  | <b>67</b>  |
| <b>AA (<math>\mu\text{mol TRE/100g}</math>)</b> | <b>291</b> | <b>263</b> | <b>837</b> | <b>104</b> | <b>231</b> | <b>256</b> | <b>287</b> | <b>387</b> | <b>371</b> | <b>168</b> | <b>59</b>  | <b>56</b>  | <b>138</b> | <b>562</b> | <b>178</b> | <b>490</b> | <b>196</b> | <b>313</b> |

\*MF: Multi-floral.
